# Supplementary material for: Prickle isoforms determine handedness of helical morphogenesis
Source: eLife. 2020 Jan 14;9:e51456. doi: 10.7554/eLife.51456 (PMC7004564; doi:10.7554/eLife.51456)
Supplement: Table 2—source data 1. [file elife-51456-table2-data1.xlsx]

## Sheet: Sheet1
Table 3 - Source Data 1 - w[1118]
w1118_24H
	5	1	10	20	3	0
	5	14	2	13	-2	0
	5	6	6	11	11	7
	5	4	2	8	10	4
	10	5	10	8	8	0
	2	-9	8	10	2	-6
	2	-2	15	23	1	0
	1	4	6	26	1	1
	1	1	6	6	9	0
	1	2	6	13	18	0
	1	7	6	8	10	3
	1	3	6	5	10	3
	-1	2	8	5	8	-1
	1	3	8	3	11	3
	1	2	10	-2	13	3
	1	3	-2	12	13	-2
	2	5	10	10	7
	2	7	10	8	5
	2	2	6	2	5
	2	0		1	5

## Sheet: Sheet2
w1118_H28
	40	28	32	31	32	25	19
	23	28	31	31	32	22	16
	24	30	38	31	32	22	19
	23	26	32	31	32	20	22
	35	27	35	31	25	15	25
	34	26	38	30	25	14	28
	31	26	25	34	25	14	21
	29	28	27	30	25	20	17
	30	26	27	33	25	25	17
	42	25	27	34	28	25	21
	42	26	30	34	29	30	17
	41	25		36	29	30	17
	35	25		36	30	30	27
		25		36	33	25	31
		25			34	23	30
		25			33	25	31
					31		29
							31

## Sheet: Sheet3
w1118_32H
	42	49	57	61	72	40
	42	49	57	64	70	47
	42	49	57	59	74	47
	42	49	56	63	73	47
	42	49	56	63	74	47
	41	49	56	59	72	51
	45	49	56	60	72	52
	45	49	59	61	75	51
	43	49	56	59	74	46
	39	49	60	64	74	43
	41	37	57	63	75	44
	42	37	54	58	75	46
	39	37	53	64	76	44
	38	44	54	65	76
	49	44	53	63
	49	44		67
	51
	49
	46

## Sheet: Sheet4
BASIC STATISTICS
Data file - D:\Bristle_figs\Angle_quanti\w1118\24H\24H.ori
w1118_24H
Analysis begun: Tuesday, February 12, 2019 6:00:12 PM
Variable	Linear	Linear	Linear	Linear	Linear	Linear
Data Type	Angles	Angles	Angles	Angles	Angles	Angles
Number of Observations	20	20	19	20	20	16
Data Grouped?	No	No	No	No	No	No
Group Width (& Number of Groups)
Mean Vector (µ)	2.449°	3.001°	7.001°	9.487°	7.4°	0.938°
Length of Mean Vector (r)	0.999	0.997	0.998	0.993	0.996	0.999
Concentration	582.005	182.089	250.056	68.699	142.951	407.932
Circular Variance	0.000859	0.003	0.002	0.007	0.004	0.001
Circular Standard Deviation	2.376°	4.252°	3.627°	6.938°	4.801°	2.839°
One Sample Tests
Rayleigh Test (Z)	19.966	19.89	18.924	19.709	19.86	15.961
Rayleigh Test (p)	8.82e-09	9.29e-09	2.05e-08	1.05e-08	9.48e-09	1.99e-07
Rao's Spacing Test (U)	331	319	324.053	314	322	324.5
Rao's Spacing Test (p)	< 0.01	< 0.01	< 0.01	< 0.01	< 0.01	< 0.01
Second Order Statistics
Grand Mean Vector (GM)	5.04°
Length of Grand Mean Vector (r)	0.996
Number of Means	6

## Sheet: Sheet5
BASIC STATISTICS
Data file - D:\Bristle_figs\Angle_quanti\w1118\28H\28H.ori
w1118_28H
Analysis begun: Tuesday, February 12, 2019 6:03:18 PM
Variable	Linear	Linear	Linear	Linear	Linear	Linear	Linear
Data Type	Angles	Angles	Angles	Angles	Angles	Angles	Angles
Number of Observations	13	16	11	14	17	16	18
Data Grouped?	No	No	No	No	No	No	No
Group Width (& Number of Groups)
Mean Vector (µ)	33.002°	26.312°	31.09°	32.714°	29.412°	22.815°	23.221°
Length of Mean Vector (r)	0.993	1	0.997	0.999	0.998	0.996	0.995
Concentration	56.486	1571.36	134.238	547.903	317.259	127.792	106.818
Circular Variance	0.007	0.000318	0.003	0.000727	0.002	0.004	0.005
Circular Standard Deviation	6.765°	1.446°	4.275°	2.185°	3.219°	5.078°	5.557°
One Sample Tests
Rayleigh Test (Z)	12.82	15.99	10.939	13.98	16.946	15.875	17.831
Rayleigh Test (p)	1.29e-06	1.96e-07	1.18e-06	7.4e-07	9.61e-08	2.08e-07	4.79e-08
Rao's Spacing Test (U)	313.308	332.5	314.273	328.286	329.824	321.5	325
Rao's Spacing Test (p)	< 0.01	< 0.01	< 0.01	< 0.01	< 0.01	< 0.01	< 0.01
Second Order Statistics
Grand Mean Vector (GM)	28.368°
Length of Grand Mean Vector (r)	0.995
Number of Means	7

## Sheet: Sheet6
BASIC STATISTICS
Data file - D:\Bristle_figs\Angle_quanti\w1118\32H\w1118_32H.ori
w1118_32H
Analysis begun: Tuesday, February 12, 2019 6:04:39 PM
Variable	Linear	Linear	Linear	Linear	Linear	Linear
Data Type	Angles	Angles	Angles	Angles	Angles	Angles
Number of Observations	19	16	15	16	14	13
Data Grouped?	No	No	No	No	No	No
Group Width (& Number of Groups)
Mean Vector (µ)	43.525°	45.818°	56.067°	62.062°	73.714°	46.539°
Length of Mean Vector (r)	0.998	0.997	0.999	0.999	1	0.998
Concentration	245.294	152.962	725.96	531.313	942.561	240.025
Circular Variance	0.002	0.003	0.000558	0.000942	0.000423	0.002
Circular Standard Deviation	3.662°	4.64°	1.914°	2.487°	1.666°	3.273°
One Sample Tests
Rayleigh Test (Z)	18.923	15.895	14.983	15.97	13.988	12.958
Rayleigh Test (p)	2.05e-08	2.06e-07	3.93e-07	1.98e-07	7.37e-07	1.26e-06
Rao's Spacing Test (U)	328.053	325.5	329	328.5	328.286	320.308
Rao's Spacing Test (p)	< 0.01	< 0.01	< 0.01	< 0.01	< 0.01	< 0.01
Second Order Statistics
Grand Mean Vector (GM)	54.588°
Length of Grand Mean Vector (r)	0.981
Number of Means	6
