# Supplementary material for: Prickle isoforms determine handedness of helical morphogenesis
Source: eLife. 2020 Jan 14;9:e51456. doi: 10.7554/eLife.51456 (PMC7004564; doi:10.7554/eLife.51456)
Supplement: Table 2—source data 2. [file elife-51456-table2-data2.xlsx]

## Sheet: Sheet1
Table 3 - Source Data 2 - pk[30]
pk30_24H
6	0	7
4	10	-10
1	11	-1
4	11	-9
-6	11	-20
-16	-9	-20
-1	7	-5
-3	5	2
-7	0	-2
3	9	0
-14	3	0
2	-9	4
4	20	-2
5	5	3
9	19	2
-11	15
-14	0
5
4
3

## Sheet: Sheet2
pk30_32H
15	7	14	-35	27	-8	-23
20	11	14	-39	19	-5	-22
27	25	15	-31	17	21	-22
17	12	8	-23	11	3	16
7	26	7	-32	7	13	-24
15	21	0	-36	-11	12	-17
16	-9	-4	-30	17	-8	13
10	19	13	-35	-5	-14	-25
10	2	-31	-38	-1	-28	-33
10	20	-25	-40	5	-26	-30
-20	25	-26	-31	-10	-24	-25
-19	2	-7	-23	2	-27	-10
-16	-1	-17	-22	-11	-27	-35
-10	7	-7	-12	-21	-24	-35
-26	-21	-7	-32	-23	-14	-46
-22	-7	-16	-20	-28	-12	-40
-25	5	-13	-16	-31	-29	-29
-24	-5	-25	-23	-29	-26	-34
-21		-24	0	-30	-13	-26
-20		-19	-33	-33	7	-38
-21		-36	-27	-33	2	-48
-10			-30	-35
-20			-23	-33
-21			-22
			-26
			-25
			-28
			-27
			-27

## Sheet: Sheet3
BASIC STATISTICS
Data file - D:\Bristle_figs\Angle_quanti\pk30\24H\24H.ori
pk30_24H
Analysis begun: Wednesday, February 13, 2019 9:49:15 AM
Variable	Linear	Linear	Linear
Data Type	Angles	Angles	Angles
Number of Observations	20	17	15
Data Grouped?	No	No	No
Group Width (& Number of Groups)
Mean Vector (µ)	358.916°	6.36°	356.625°
Length of Mean Vector (r)	0.992	0.99	0.991
Concentration	60.468	50.566	43.567
Circular Variance	0.008	0.01	0.009
Circular Standard Deviation	7.399°	8.098°	7.847°
One Sample Tests
Rayleigh Test (Z)	19.669	16.664	14.721
Rayleigh Test (p)	1.08e-08	1.13e-07	4.43e-07
Rao's Spacing Test (U)	317	309.824	309
Rao's Spacing Test (p)	< 0.01	< 0.01	< 0.01
Second Order Statistics
Grand Mean Vector (GM)	0.63°
Length of Grand Mean Vector (r)	0.988
Number of Means	3

## Sheet: Sheet4
BASIC STATISTICS
Data file - D:\Bristle_figs\Angle_quanti\pk30\32H\32H.ori
pk30_32H
Analysis begun: Wednesday, February 13, 2019 9:50:56 AM
Variable	Linear	Linear	Linear	Linear	Linear	Linear	Linear
Data Type	Angles	Angles	Angles	Angles	Angles	Angles	Angles
Number of Observations	24	18	21	29	23	21	21
Data Grouped?	No	No	No	No	No	No	No
Group Width (& Number of Groups)
Mean Vector (µ)	354.562°	7.758°	351.124°	332.865°	349.934°	349.1°	334.367°
Length of Mean Vector (r)	0.953	0.974	0.962	0.989	0.942	0.966	0.963
Concentration	10.907	19.844	13.548	47.73	8.897	14.778	13.94
Circular Variance	0.047	0.026	0.038	0.011	0.058	0.034	0.037
Circular Standard Deviation	17.778°	13.031°	15.872°	8.337°	19.803°	15.171°	15.638°
One Sample Tests
Rayleigh Test (Z)	21.797	17.093	19.449	28.392	20.41	19.578	19.492
Rayleigh Test (p)	1.5e-09	7.51e-08	1.1e-08	5.58e-12	4.49e-09	1.01e-08	1.07e-08
Rao's Spacing Test (U)	294	293	291.857	307.586	282.348	292.857	284.714
Rao's Spacing Test (p)	< 0.01	< 0.01	< 0.01	< 0.01	< 0.01	< 0.01	< 0.01
Second Order Statistics
Grand Mean Vector (GM)	348.482°
Length of Grand Mean Vector (r)	0.946
Number of Means	7
