# Supplementary material for: Prickle isoforms determine handedness of helical morphogenesis
Source: eLife. 2020 Jan 14;9:e51456. doi: 10.7554/eLife.51456 (PMC7004564; doi:10.7554/eLife.51456)
Supplement: Table 2—source data 3. [file elife-51456-table2-data3.xlsx]

## Sheet: Sheet1
Table 3 - Source Data 3 - pk[pksple13].xlsx
pksple13_24
	10	-4	-4
	5	-4	0
	2	0	0
	3	0	3
	3	0	3
	-1	-2	0
	2	-5	3
	4	-3	3
	0	0	0
	0	-1	2
	11	0	0
	13	-4	8
	6	3	12
	7	-7	0
	5	-3	3
	10	-4	-3
	8	-4	0
	10	-3	-2
	1	-1	-10
	2	4	-2
	0	0	-5
	1		-3

## Sheet: Sheet2
pksple13_32H
	25	55	50
	49	42	50
	48	54	48
	48	54	40
	48	56	43
	48	45	43
	48	46	38
	48	45	39
	48	45	43
	48	45	50
	48	57	48
	57	57	57
	41	25	57
	41	51	57
	41	50	57
	41	47	53
	41	47	45
	57	48	45
	57	47	45
	46	47
	46
	46
	46
	57

## Sheet: Sheet3
BASIC STATISTICS
Data file - D:\Bristle_figs\Angle_quanti\pksple13\24H.ori
pksple13_24H
Analysis begun: Wednesday, February 13, 2019 9:47:17 AM
Variable	Linear	Linear	Linear
Data Type	Angles	Angles	Angles
Number of Observations	22	21	22
Data Grouped?	No	No	No
Group Width (& Number of Groups)
Mean Vector (µ)	4.635°	358.19°	0.362°
Length of Mean Vector (r)	0.997	0.999	0.997
Concentration	198.236	481.769	172.125
Circular Variance	0.003	0.001	0.003
Circular Standard Deviation	4.075°	2.612°	4.374°
One Sample Tests
Rayleigh Test (Z)	21.889	20.956	21.872
Rayleigh Test (p)	1.75e-09	3.87e-09	1.77e-09
Rao's Spacing Test (U)	329.636	331.857	321.636
Rao's Spacing Test (p)	< 0.01	< 0.01	< 0.01
Second Order Statistics
Grand Mean Vector (GM)	1.061°
Length of Grand Mean Vector (r)	0.997
Number of Means	3

## Sheet: Sheet4
BASIC STATISTICS
Data file - D:\Bristle_figs\Angle_quanti\pksple13\32H.ori
pksple13_32H
Analysis begun: Wednesday, February 13, 2019 9:47:58 AM
Variable	Linear	Linear	Linear
Data Type	Angles	Angles	Angles
Number of Observations	24	20	19
Data Grouped?	No	No	No
Group Width (& Number of Groups)
Mean Vector (µ)	46.807°	48.176°	47.787°
Length of Mean Vector (r)	0.993	0.993	0.994
Concentration	73.679	68.594	88.614
Circular Variance	0.007	0.007	0.006
Circular Standard Deviation	6.698°	6.944°	6.104°
One Sample Tests
Rayleigh Test (Z)	23.674	19.708	18.786
Rayleigh Test (p)	3.69e-10	1.05e-08	2.24e-08
Rao's Spacing Test (U)	314	310	322.053
Rao's Spacing Test (p)	< 0.01	< 0.01	< 0.01
Second Order Statistics
Grand Mean Vector (GM)	47.59°
Length of Grand Mean Vector (r)	0.993
Number of Means	3
