# Supplementary material for: Prickle isoforms determine handedness of helical morphogenesis
Source: eLife. 2020 Jan 14;9:e51456. doi: 10.7554/eLife.51456 (PMC7004564; doi:10.7554/eLife.51456)
Supplement: Table 2—source data 4. [file elife-51456-table2-data4.xlsx]

## Sheet: Sheet1
Table 3 - Source Data 4 - pk[sple1]
sple1_24H
	10	0	34
	12	3	29
	17	19	5
	15	19	24
	15	18	12
	4	19	13
	4	15	19
	10	18	29
	8	10	25
	9	18	32
	3	18	37
	5	19	21
	11	19	22
	5	19	22
	5	20	21
	5	16	40
	4	16	41
	7	-2	41
	15	16	41
	14	16	41
	5	16	41
	4		41
	4		41
	4		41
	7		41
	15
	14

## Sheet: Sheet2
sple1_32H
	63	67	53	53
	63	68	54	56
	63	68	54	54
	63	68	54	67
	56	68	51	65
	64	68	52	61
	64	68	45	56
	60	56	59	48
	64	65	59	48
	64	65	53	57
	64	68	50	57
	65	68	47	57
	65	67	42	57
	67	67	42	57
	67	65	42	57
	67	67	41	64
	64	74	41	60
	63		42	64
	62

## Sheet: Sheet3
BASIC STATISTICS
Data file - D:\Bristle_figs\Angle_quanti\sple1\24H.ori
sple1_24H
Analysis begun: Wednesday, February 13, 2019 9:44:03 AM
Variable	Linear	Linear	Linear
Data Type	Angles	Angles	Angles
Number of Observations	27	21	25
Data Grouped?	No	No	No
Group Width (& Number of Groups)
Mean Vector (µ)	8.554°	14.879°	30.198°
Length of Mean Vector (r)	0.997	0.994	0.982
Concentration	163.725	82.255	28.079
Circular Variance	0.003	0.006	0.018
Circular Standard Deviation	4.485°	6.337°	10.912°
One Sample Tests
Rayleigh Test (Z)	26.835	20.745	24.11
Rayleigh Test (p)	2.33e-11	4.5e-09	2.39e-10
Rao's Spacing Test (U)	332.667	320.857	309.6
Rao's Spacing Test (p)	< 0.01	< 0.01	< 0.01
Second Order Statistics
Grand Mean Vector (GM)	17.8°
Length of Grand Mean Vector (r)	0.979
Number of Means	3

## Sheet: Sheet4
BASIC STATISTICS
Data file - D:\Bristle_figs\Angle_quanti\sple1\32H.ori
sple1_32H
Analysis begun: Wednesday, February 13, 2019 9:45:58 AM
Variable	Linear	Linear	Linear	Linear
Data Type	Angles	Angles	Angles	Angles
Number of Observations	19	17	18	18
Data Grouped?	No	No	No	No
Group Width (& Number of Groups)
Mean Vector (µ)	63.58°	66.885°	48.944°	57.667°
Length of Mean Vector (r)	0.999	0.998	0.994	0.996
Concentration	544.839	294.995	89.255	126.733
Circular Variance	0.000918	0.002	0.006	0.004
Circular Standard Deviation	2.456°	3.339°	6.082°	5.1°
One Sample Tests
Rayleigh Test (Z)	18.965	16.942	17.798	17.858
Rayleigh Test (p)	1.99e-08	9.63e-08	4.89e-08	4.71e-08
Rao's Spacing Test (U)	330.053	320.824	322	321
Rao's Spacing Test (p)	< 0.01	< 0.01	< 0.01	< 0.01
Second Order Statistics
Grand Mean Vector (GM)	59.288°
Length of Grand Mean Vector (r)	0.99
Number of Means	4
