# Supplementary material for: Prickle isoforms determine handedness of helical morphogenesis
Source: eLife. 2020 Jan 14;9:e51456. doi: 10.7554/eLife.51456 (PMC7004564; doi:10.7554/eLife.51456)
Supplement: Table 2—source data 5. [file elife-51456-table2-data5.xlsx]

## Sheet: Sheet1
Table 3 - Source Data 5 - MS1096>>sple
MS1096_sple_24H
	0	-4	-10
	0	-4	-9
	0	-4	-7
	0	-1	-8
	18	-3	10
	0	-5	4
	-3	-2	-20
	-6	-5	-5
	-3	-1	-3
	0	-1	-5
	-18	5	-1
	-7	3	-1
	10	-3	5
	6	-5	3
	0	-2	-2
	0	4	-5
	12	-5	-3
	5	0	5
	-3	-5	-5
	0	-10	0
	-190	-10	-5
			-10
			-11

## Sheet: Sheet2
MS1096_sple_32H
	-34	-20	-27
	-34	-23	-30
	-39	-24	-33
	-34	-27	-35
	-34	-31	-34
	-34	-30	-37
	-34	-20	-30
	-34	-17	-30
	-29	-14	-30
	-24	-15	-30
	-29	-16	-30
	-29	-19	-22
	-34	-7	-22
	-34	-4	-21
	-25	-8	7
	-24	-28	-15
	-29	-20	-22
	-34	-27	-31
	-29	-30	-34
	-29	-15	-35
	-29	-30	-6
	-150	-31

## Sheet: Sheet3
BASIC STATISTICS
Data file - D:\Bristle_figs\Angle_quanti\MS1096_sple\24H.ori
MS1096_sple_24H
Analysis begun: Wednesday, February 13, 2019 9:52:24 AM
Variable	Linear	Linear	Linear
Data Type	Angles	Angles	Angles
Number of Observations	20	21	23
Data Grouped?	No	No	No
Group Width (& Number of Groups)
Mean Vector (µ)	0.548°	357.238°	356.394°
Length of Mean Vector (r)	0.992	0.998	0.994
Concentration	62.617	236.755	80.905
Circular Variance	0.008	0.002	0.006
Circular Standard Deviation	7.27°	3.728°	6.39°
One Sample Tests
Rayleigh Test (Z)	19.681	20.911	22.716
Rayleigh Test (p)	1.07e-08	3.99e-09	8.47e-10
Rao's Spacing Test (U)	306	327.857	314.348
Rao's Spacing Test (p)	< 0.01	< 0.01	< 0.01
Second Order Statistics
Grand Mean Vector (GM)	358.057°
Length of Grand Mean Vector (r)	0.994
Number of Means	3

## Sheet: Sheet4
BASIC STATISTICS
Data file - D:\Bristle_figs\Angle_quanti\MS1096_sple\32H.ori
MS1096_sple_32H
Analysis begun: Wednesday, February 13, 2019 9:53:15 AM
Variable	Linear	Linear	Linear
Data Type	Angles	Angles	Angles
Number of Observations	22	22	21
Data Grouped?	No	No	No
Group Width (& Number of Groups)
Mean Vector (µ)	326.358°	339.262°	333.853°
Length of Mean Vector (r)	0.931	0.99	0.984
Concentration	7.557	52.085	31.18
Circular Variance	0.069	0.01	0.016
Circular Standard Deviation	21.615°	7.978°	10.345°
One Sample Tests
Rayleigh Test (Z)	19.082	21.578	20.326
Rayleigh Test (p)	1.24e-08	2.19e-09	6.04e-09
Rao's Spacing Test (U)	312.273	316.636	298.857
Rao's Spacing Test (p)	< 0.01	< 0.01	< 0.01
Second Order Statistics
Grand Mean Vector (GM)	333.296°
Length of Grand Mean Vector (r)	0.964
Number of Means	3
