# Supplementary material for: Prickle isoforms determine handedness of helical morphogenesis
Source: eLife. 2020 Jan 14;9:e51456. doi: 10.7554/eLife.51456 (PMC7004564; doi:10.7554/eLife.51456)
Supplement: Table 2—source data 6. [file elife-51456-table2-data6.xlsx]

## Sheet: Sheet1
Table 3 - Source Data 6 - fz[R52]
fzR52_24H
5	5	1
3	3	1
5	4	1
5	3	-5
0	12	7
0	13	5
0	8	1
0	2	9
0	7	6
0	4	6
2	-2	6
9	0	7
5	0	6
2	0	-5
5	0	2
10	0	2
-3		2
11		0
		2
		3
		9
		2

## Sheet: Sheet2
fzR52_32H
14	22	-10	10	14	18
35	28	-15	30	29	22
19	30	-5	3	28	27
14	30	183	0	14	30
14	34	20	8	23	13
14	40	19	35	14	16
14	32	-5	24	5	7
14	30	-5	28	28	40
33	30	4	4	25	33
10	46	165	8	-9	46
14	33	-13	53	24	42
16	33	-11	22	14	21
17	21	-6	27	18	18
11	19	4	17	22	33
15	15	10	27	11	33
47	24	19	14	27	29
19	25	10	2	23	39
11	25	10	137	2
11	24	10	8	16
19			8	30
53			13
190			120
8

## Sheet: Sheet3
BASIC STATISTICS
Data file - D:\Bristle_figs\Angle_quanti\fzR52\24H\24H.ori
fzR52_24H
Analysis begun: Wednesday, February 13, 2019 9:54:33 AM
Variable	Linear	Linear	Linear
Data Type	Angles	Angles	Angles
Number of Observations	18	16	22
Data Grouped?	No	No	No
Group Width (& Number of Groups)
Mean Vector (µ)	3.276°	3.684°	3.092°
Length of Mean Vector (r)	0.998	0.997	0.998
Concentration	228.062	180.71	239.78
Circular Variance	0.002	0.003	0.002
Circular Standard Deviation	3.798°	4.268°	3.704°
One Sample Tests
Rayleigh Test (Z)	17.921	15.911	21.908
Rayleigh Test (p)	4.53e-08	2.04e-07	1.72e-09
Rao's Spacing Test (U)	326	322.5	329.636
Rao's Spacing Test (p)	< 0.01	< 0.01	< 0.01
Second Order Statistics
Grand Mean Vector (GM)	3.351°
Length of Grand Mean Vector (r)	0.998
Number of Means	3

## Sheet: Sheet4
BASIC STATISTICS
Data file - D:\Bristle_figs\Angle_quanti\fzR52\33H\32H.ori
fzR52_32H
Analysis begun: Wednesday, February 13, 2019 9:55:19 AM
Variable	Linear	Linear	Linear	Linear	Linear	Linear
Data Type	Angles	Angles	Angles	Angles	Angles	Angles
Number of Observations	23	19	19	22	20	17
Data Grouped?	No	No	No	No	No	No
Group Width (& Number of Groups)
Mean Vector (µ)	19.476°	28.465°	3.193°	22.547°	17.949°	27.476°
Length of Mean Vector (r)	0.894	0.992	0.774	0.857	0.985	0.983
Concentration	5.018	65.046	2.582	3.797	33.919	28.957
Circular Variance	0.106	0.008	0.226	0.143	0.015	0.017
Circular Standard Deviation	27.102°	7.132°	40.973°	31.885°	9.912°	10.742°
One Sample Tests
Rayleigh Test (Z)	18.389	18.708	11.394	16.141	19.41	16.413
Rayleigh Test (p)	1.72e-08	2.36e-08	1.48e-06	7.23e-08	1.29e-08	1.31e-07
Rao's Spacing Test (U)	283.696	310.053	269.105	259.545	303	299.824
Rao's Spacing Test (p)	< 0.01	< 0.01	< 0.01	< 0.01	< 0.01	< 0.01
Second Order Statistics
Grand Mean Vector (GM)	20.471°
Length of Grand Mean Vector (r)	0.905
Number of Means	6
