# Supplementary material for: Prickle isoforms determine handedness of helical morphogenesis
Source: eLife. 2020 Jan 14;9:e51456. doi: 10.7554/eLife.51456 (PMC7004564; doi:10.7554/eLife.51456)
Supplement: Table 2—source data 7. [file elife-51456-table2-data7.xlsx]

## Sheet: Sheet1
Table 3 - Source Data 7 - dsh[1]
dsh1_24H
	4	4
	7	3
	10	12
	10	11
	-3	3
	8	-4
	9	5
	4	7
	-5	9
	3	7
	0	5
	9	3
	11	11
	4	-3
	13
	-1
	17
	11
	6
	6

## Sheet: Sheet2
dsh1_32H
	7	29	48	16	-21	24
	4	30	31	14	-21	34
	6	21	40	6	-24	21
	25	27	45	10	10	19
	26	15	50	17	14	23
	20	10	53	25	18	27
	15	170	37	18	9	18
	12	21	62	20	17	7
	15	23	30	14	6	15
	0	25	17	13	27	19
	33	24	21	9	13	16
	27	24	49	10	19	6
	-8	21	43	6	47	11
	15		42	6	9	2
	29		43	25	23	-10
	11		42	3	23	8
	22		43	5	35	10
	21		43	12	11	12
	17		40		24	2
	19				11
					21

## Sheet: Sheet3
BASIC STATISTICS
Data file - D:\Bristle_figs\Angle_quanti\dsh1\24H.ori
dsh1_24H
Analysis begun: Wednesday, February 13, 2019 9:59:02 AM
Variable	Linear	Linear
Data Type	Angles	Angles
Number of Observations	20	14
Data Grouped?	No	No
Group Width (& Number of Groups)
Mean Vector (µ)	6.152°	5.216°
Length of Mean Vector (r)	0.996	0.997
Concentration	113.175	121.452
Circular Variance	0.004	0.003
Circular Standard Deviation	5.398°	4.648°
One Sample Tests
Rayleigh Test (Z)	19.823	13.908
Rayleigh Test (p)	9.73e-09	7.59e-07
Rao's Spacing Test (U)	320	318.286
Rao's Spacing Test (p)	< 0.01	< 0.01
Second Order Statistics
Grand Mean Vector (GM)	5.684°
Length of Grand Mean Vector (r)	0.996
Number of Means	2

## Sheet: Sheet4
BASIC STATISTICS
Data file - D:\Bristle_figs\Angle_quanti\dsh1\32H.ori
dsh1_32H
Analysis begun: Wednesday, February 13, 2019 10:00:50 AM
Variable	Linear	Linear	Linear	Linear	Linear	Linear
Data Type	Angles	Angles	Angles	Angles	Angles	Angles
Number of Observations	20	13	19	18	21	19
Data Grouped?	No	No	No	No	No	No
Group Width (& Number of Groups)
Mean Vector (µ)	15.825°	25.278°	41.031°	12.717°	13.08°	13.909°
Length of Mean Vector (r)	0.985	0.855	0.984	0.994	0.957	0.985
Concentration	32.556	2.943	31.301	80.991	11.907	33.137
Circular Variance	0.015	0.145	0.016	0.006	0.043	0.015
Circular Standard Deviation	10.121°	32.056°	10.325°	6.386°	16.978°	10.03°
One Sample Tests
Rayleigh Test (Z)	19.386	9.506	18.393	17.778	19.235	18.427
Rayleigh Test (p)	1.31e-08	2.74e-06	2.9e-08	4.95e-08	1.27e-08	2.83e-08
Rao's Spacing Test (U)	301	284.615	296.053	318	281.714	297.053
Rao's Spacing Test (p)	< 0.01	< 0.01	< 0.01	< 0.01	< 0.01	< 0.01
Second Order Statistics
Grand Mean Vector (GM)	20.144°
Length of Grand Mean Vector (r)	0.944
Number of Means	6
