# Supplementary material for: Prickle isoforms determine handedness of helical morphogenesis
Source: eLife. 2020 Jan 14;9:e51456. doi: 10.7554/eLife.51456 (PMC7004564; doi:10.7554/eLife.51456)
Supplement: Table 2—source data 8. [file elife-51456-table2-data8.xlsx]

## Sheet: Sheet1
Table 3 - Source Data 8 - fmiRNAi
MS1096_fmii_24H
	-1	-3	7
	7	0	10
	-1	5	-5
	2	0	0
	4	-3	5
	4	5	5
	5	-5	3
	5	-8	-4
	8	-3	0
	-3	-3	-5
	6	0	-4
	20	0	-3
	-6	-3	0
	4	-4	0
	5	0	0
	2	0	0
	4	0	-5
	6	0	-2
	4	0	0
	15	-1	0
	8	2	4
	4	15	8
	4	-2	6
	-5	-5	0
	-4
	-8
	0
	0

## Sheet: Sheet2
MS1096_fmii_32H
	25	25	17	14
	0	12	12	15
	23	28	14	5
	13	19	20	-2
	21	19	29	35
	14	35	15	31
	25	7	16	38
	38	24	20	20
	23	26	23	19
	38	22	19	5
	19	32	9	18
	29	57	10	10
	-17	28	21	25
	6	26	10	16
	-14	10	7	30
	9	25	33	20
	17	7	36	19
	22	46	43	24
	7	35	14	7
	25	12	29	8
	22	2	33	12
	23	9	6	15
	0	-3	15	16
	17		40	20
			19	33
			20	34
				10
				0

## Sheet: Sheet3
BASIC STATISTICS
Data file - D:\Bristle_figs\Angle_quanti\fmii\24H.ori
MS1096_fmii_24H
Analysis begun: Wednesday, February 13, 2019 9:56:23 AM
Variable	Linear	Linear	Linear
Data Type	Angles	Angles	Angles
Number of Observations	28	24	24
Data Grouped?	No	No	No
Group Width (& Number of Groups)
Mean Vector (µ)	3.173°	359.451°	0.832°
Length of Mean Vector (r)	0.995	0.997	0.997
Concentration	98.589	175.208	184.812
Circular Variance	0.005	0.003	0.003
Circular Standard Deviation	5.785°	4.335°	4.22°
One Sample Tests
Rayleigh Test (Z)	27.716	23.863	23.87
Rayleigh Test (p)	1.05e-11	3.2e-10	3.18e-10
Rao's Spacing Test (U)	319.143	322	330
Rao's Spacing Test (p)	< 0.01	< 0.01	< 0.01
Second Order Statistics
Grand Mean Vector (GM)	1.15°
Length of Grand Mean Vector (r)	0.996
Number of Means	3

## Sheet: Sheet4
BASIC STATISTICS
Data file - D:\Bristle_figs\Angle_quanti\fmii\32H.ori
MS1096_fmii_32H
Analysis begun: Wednesday, February 13, 2019 9:57:05 AM
Variable	Linear	Linear	Linear	Linear
Data Type	Angles	Angles	Angles	Angles
Number of Observations	24	22	26	28
Data Grouped?	No	No	No	No
Group Width (& Number of Groups)
Mean Vector (µ)	16.141°	22.929°	20.35°	17.74°
Length of Mean Vector (r)	0.973	0.975	0.985	0.983
Concentration	18.535	19.931	33.422	30.397
Circular Variance	0.027	0.025	0.015	0.017
Circular Standard Deviation	13.496°	13.001°	9.987°	10.48°
One Sample Tests
Rayleigh Test (Z)	22.705	20.896	25.222	27.079
Rayleigh Test (p)	7.67e-10	3.58e-09	9.17e-11	1.76e-11
Rao's Spacing Test (U)	290	288.636	309.154	307.143
Rao's Spacing Test (p)	< 0.01	< 0.01	< 0.01	< 0.01
Second Order Statistics
Grand Mean Vector (GM)	19.291°
Length of Grand Mean Vector (r)	0.978
Number of Means	4
