# Supplementary material for: Prickle isoforms determine handedness of helical morphogenesis
Source: eLife. 2020 Jan 14;9:e51456. doi: 10.7554/eLife.51456 (PMC7004564; doi:10.7554/eLife.51456)
Supplement: Table 2—source data 9. [file elife-51456-table2-data9.xlsx]

## Sheet: Sheet1
Table 3 - Source Data 9 - vang[stbm6]
stbm6_24H
-2	8	3
6	6	3
-4	10	1
7	2	-1
205	2	2
-4	0	0
-9	2	4
0	2	1
4	0	3
3	5	-6
-5	-5	3
-6	-10	-1
0	5	-2
11	-7	7
-8	0	6
-6	7	-2
-5	5	12
10	6	8
9	2	-1
10	-4	-1
10	9
10

## Sheet: Sheet2
stbm6_32H
34	45	25	12	33	18
21	45	30	36	32	7
13	36	19	47	39	20
-3	34	38	36	42	25
-5	41	23	14	47	21
23	49	22	9	52	17
21	48	27	40	54	7
10	53	14	40	37	4
4	50	29	22	42	13
4	47	30	10	30	1
6	160	34	10	25	11
1	48	17	32	22	44
1	37	15	26	33	29
3	42	18	19	27	8
26	19	17	23	33	5
-11	38	19	10	39	14
9	39	63	9	32	1
	37	25	25	39	17
	50	29	14
	35
	40
	171
	41

## Sheet: Sheet3
BASIC STATISTICS
Data file - D:\Bristle_figs\Angle_quanti\stbm6\24H\24H.ori
stbm6_24H
Analysis begun: Wednesday, February 13, 2019 9:41:26 AM
Variable	Linear	Linear	Linear
Data Type	Angles	Angles	Angles
Number of Observations	22	21	20
Data Grouped?	No	No	No
Group Width (& Number of Groups)
Mean Vector (µ)	0.328°	2.147°	1.948°
Length of Mean Vector (r)	0.906	0.996	0.998
Concentration	5.627	124.797	203.829
Circular Variance	0.094	0.004	0.002
Circular Standard Deviation	25.408°	5.139°	4.018°
One Sample Tests
Rayleigh Test (Z)	18.072	20.832	19.902
Rayleigh Test (p)	2.37e-08	4.23e-09	9.21e-09
Rao's Spacing Test (U)	307.273	322.857	324
Rao's Spacing Test (p)	< 0.01	< 0.01	< 0.01
Second Order Statistics
Grand Mean Vector (GM)	1.51°
Length of Grand Mean Vector (r)	0.967
Number of Means	3

## Sheet: Sheet4
BASIC STATISTICS
Data file - D:\Bristle_figs\Angle_quanti\stbm6\32H\32H.ori
stbm6_32H
Analysis begun: Wednesday, February 13, 2019 9:42:54 AM
Variable	Linear	Linear	Linear	Linear	Linear	Linear
Data Type	Angles	Angles	Angles	Angles	Angles	Angles
Number of Observations	17	23	19	19	18	18
Data Grouped?	No	No	No	No	No	No
Group Width (& Number of Groups)
Mean Vector (µ)	9.202°	46.434°	25.874°	22.801°	36.543°	14.494°
Length of Mean Vector (r)	0.979	0.86	0.982	0.978	0.989	0.983
Concentration	23.93	3.885	28.677	22.815	46.331	29.809
Circular Variance	0.021	0.14	0.018	0.022	0.011	0.017
Circular Standard Deviation	11.839°	31.452°	10.795°	12.132°	8.464°	10.585°
One Sample Tests
Rayleigh Test (Z)	16.289	17.016	18.337	18.167	17.611	17.396
Rayleigh Test (p)	1.4e-07	3.93e-08	3e-08	3.35e-08	5.49e-08	6.27e-08
Rao's Spacing Test (U)	293.824	283.696	298.105	303.053	308	297
Rao's Spacing Test (p)	< 0.01	< 0.01	< 0.01	< 0.01	< 0.01	< 0.01
Second Order Statistics
Grand Mean Vector (GM)	25.447°
Length of Grand Mean Vector (r)	0.94
Number of Means	6
