# Supplementary material for: Prickle isoforms determine handedness of helical morphogenesis
Source: eLife. 2020 Jan 14;9:e51456. doi: 10.7554/eLife.51456 (PMC7004564; doi:10.7554/eLife.51456)
Supplement: Table 2—source data 10. [file elife-51456-table2-data10.xlsx]

## Sheet: Sheet1
Table 3 - Source Data 10 - w[1118], MS1096>dsRNAi
dsRNAi_32H
	42	9	68
	43	14	66
	31	14	68
	35	-6	69
	21	-8	71
	49	3	60
	53	2	55
	9	20	54
	14	21	44
	-9	60	32
	-16	32	-16
	-18	20	-57
	-20	31	-38
	-21	62	-39
	-36	62
	-35	63
	-29	12
	-8	60
	8
	17
	30
	27
	38
	40
	44
	47

## Sheet: Sheet2
BASIC STATISTICS
Data file - C:\Users\Axelrod Lab\Desktop\dsRNAi.ori
dsRNAi
Analysis begun: Saturday, November 2, 2019 12:25:34 PM
Variable	Linear	Linear	Linear
Data Type	Angles	Angles	Angles
Number of Observations	26	18	14
Data Grouped?	No	No	No
Group Width (& Number of Groups)
Mean Vector (µ)	14.125°	25.842°	36.425°
Length of Mean Vector (r)	0.881	0.914	0.723
Concentration	4.518	6.072	1.716
Circular Variance	0.119	0.086	0.277
Circular Standard Deviation	28.78°	24.357°	46.189°
One Sample Tests
Rayleigh Test (Z)	20.202	15.024	7.309
Rayleigh Test (p)	3.74e-09	2.24e-07	0.00024
Rao's Spacing Test (U)	259.308	277	228.571
Rao's Spacing Test (p)	< 0.01	< 0.01	< 0.01
Second Order Statistics
Grand Mean Vector (GM)	16.593°
Length of Grand Mean Vector (r)	0.79
Number of Means	4
