# Supplementary material for: Prickle isoforms determine handedness of helical morphogenesis
Source: eLife. 2020 Jan 14;9:e51456. doi: 10.7554/eLife.51456 (PMC7004564; doi:10.7554/eLife.51456)
Supplement: Table 2—source data 11. [file elife-51456-table2-data11.xlsx]

## Sheet: Sheet1
Table 3 - Source Data 11 - pk[pk], MS1096>dsRNAi
dsRNAi_pk30
	9	39	46
	1	52	56
	20	54	49
	39	56	37
	0	53	54
	3	56	32
	2	46	60
	23	40	38
	41	24	25
	40	44	32
	25	49	28
	27	33	26
	19	38	50
	18	19	50
	20	17	41
	29	19	39
	14	18	36
	29	2	33
	1	14	35
	44	8	24
	17	17	21
	1	10	18
	32	13	15
	24
	29
	10

## Sheet: Sheet2
BASIC STATISTICS
Data file - C:\Users\Axelrod Lab\Desktop\dsRNAi_pk30.ori
dsRNAi_pk30
Analysis begun: Saturday, November 2, 2019 12:27:31 PM
Variable	Angles	Angles	Angles
Data Type	Angles	Angles	Angles
Number of Observations	26	23	23
Data Grouped?	No	No	No
Group Width (& Number of Groups)
Mean Vector (µ)	19.881°	31.345°	36.726°
Length of Mean Vector (r)	0.973	0.955	0.977
Concentration	18.858	11.277	22.33
Circular Variance	0.027	0.045	0.023
Circular Standard Deviation	13.377°	17.469°	12.266°
One Sample Tests
Rayleigh Test (Z)	24.621	20.958	21.97
Rayleigh Test (p)	1.46e-10	3.05e-09	1.47e-09
Rao's Spacing Test (U)	302.154	290.348	299.348
Rao's Spacing Test (p)	< 0.01	< 0.01	< 0.01
Second Order Statistics
Grand Mean Vector (GM)	29.323°
Length of Grand Mean Vector (r)	0.961
Number of Means	3
