# Supplementary material for: Prickle isoforms determine handedness of helical morphogenesis
Source: eLife. 2020 Jan 14;9:e51456. doi: 10.7554/eLife.51456 (PMC7004564; doi:10.7554/eLife.51456)
Supplement: Table 2—source data 12. [file elife-51456-table2-data12.xlsx]

## Sheet: Sheet1
Table 3 - Source Data 12 - pk[sple], MS1096>dsRNAi
dsRNAi_sple1
	6	39	-6
	3	35	-5
	3	31	0
	11	30	-5
	6	14	-8
	9	19	-5
	7	10	0
	0	12	-19
	0	27	-23
	0	21	-22
	8	30	-6
	0	5	-11
	-3	17	0
	5	-5	-10
	-5	-8	-1
	8	-10	-11
	14	21	-14
	5	16	-9
	-2	14	35
		4	36
		14	35
		-10	33
		-2	34
		-2	33
		-15	27
		2	26
		5	20
		2	18
		0	10
		1	9
			9

## Sheet: Sheet2
BASIC STATISTICS
Data file - C:\Users\Axelrod Lab\Desktop\dsRNAi_sple1.ori
dsRNAi_sple1
Analysis begun: Saturday, November 2, 2019 12:29:30 PM
Variable	Linear	Linear	Linear
Data Type	Angles	Angles	Angles
Number of Observations	19	30	31
Data Grouped?	No	No	No
Group Width (& Number of Groups)
Mean Vector (µ)	3.947°	10.538°	5.353°
Length of Mean Vector (r)	0.996	0.969	0.948
Concentration	136.941	16.575	9.895
Circular Variance	0.004	0.031	0.052
Circular Standard Deviation	4.905°	14.296°	18.715°
One Sample Tests
Rayleigh Test (Z)	18.861	28.189	27.863
Rayleigh Test (p)	2.13e-08	6.07e-12	7.31e-12
Rao's Spacing Test (U)	322.053	294	289.387
Rao's Spacing Test (p)	< 0.01	< 0.01	< 0.01
Second Order Statistics
Grand Mean Vector (GM)	6.596°
Length of Grand Mean Vector (r)	0.97
Number of Means	3
