# Supplementary material for: Prickle isoforms determine handedness of helical morphogenesis
Source: eLife. 2020 Jan 14;9:e51456. doi: 10.7554/eLife.51456 (PMC7004564; doi:10.7554/eLife.51456)
Supplement: Table 2—source data 13. [file elife-51456-table2-data13.xlsx]

## Sheet: Sheet1
Table 3 - Source Data 13 - pk[pk-sple], MS1096>dsRNAi
dsRNAi_pksple13
	38	45	45
	38	44	44
	38	45	48
	34	31	49
	33	34	45
	37	46	53
	34	45	46
	33	35	46
	33	44	39
	39	44	36
	16	44	40
	46	44	49
	37	35	53
	37	36	52
	36	38	52
	36	47	53
	46	47	45
	29	40	39
	29	41
	30	15
	29
	31

## Sheet: Sheet2
BASIC STATISTICS
Data file - C:\Users\Axelrod Lab\Desktop\dsRNAi_pksple13.ori
dsRNAi_pksple13
Analysis begun: Saturday, November 2, 2019 12:28:38 PM
Variable	Angles	Angles	Angles
Data Type	Angles	Angles	Angles
Number of Observations	22	20	18
Data Grouped?	No	No	No
Group Width (& Number of Groups)
Mean Vector (µ)	34.508°	40.039°	46.336°
Length of Mean Vector (r)	0.994	0.992	0.996
Concentration	89.027	60.397	123.532
Circular Variance	0.006	0.008	0.004
Circular Standard Deviation	6.09°	7.403°	5.166°
One Sample Tests
Rayleigh Test (Z)	21.753	19.669	17.854
Rayleigh Test (p)	1.93e-09	1.08e-08	4.72e-08
Rao's Spacing Test (U)	313.636	310	323
Rao's Spacing Test (p)	< 0.01	< 0.01	< 0.01
Second Order Statistics
Grand Mean Vector (GM)	40.297°
Length of Grand Mean Vector (r)	0.99
Number of Means	3
