# Supplementary figures and images for: Prickle isoforms determine handedness of helical morphogenesis
Source: eLife journal article supplement (doi:10.7554/elife.51456), 2020-01-14

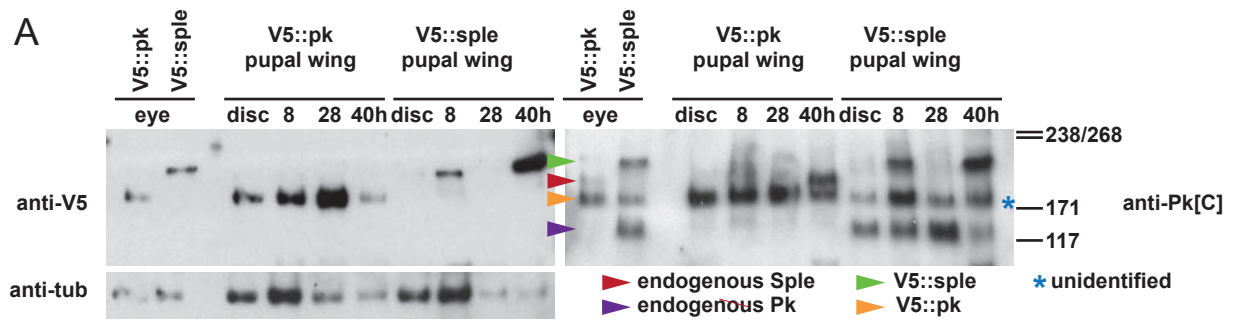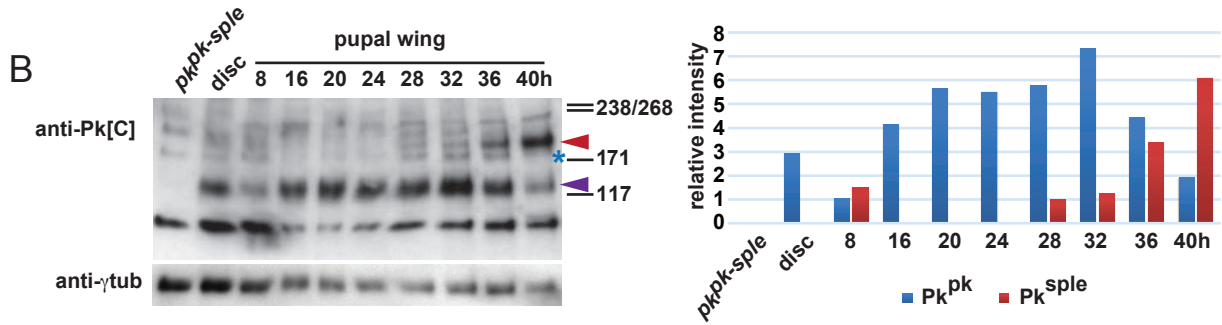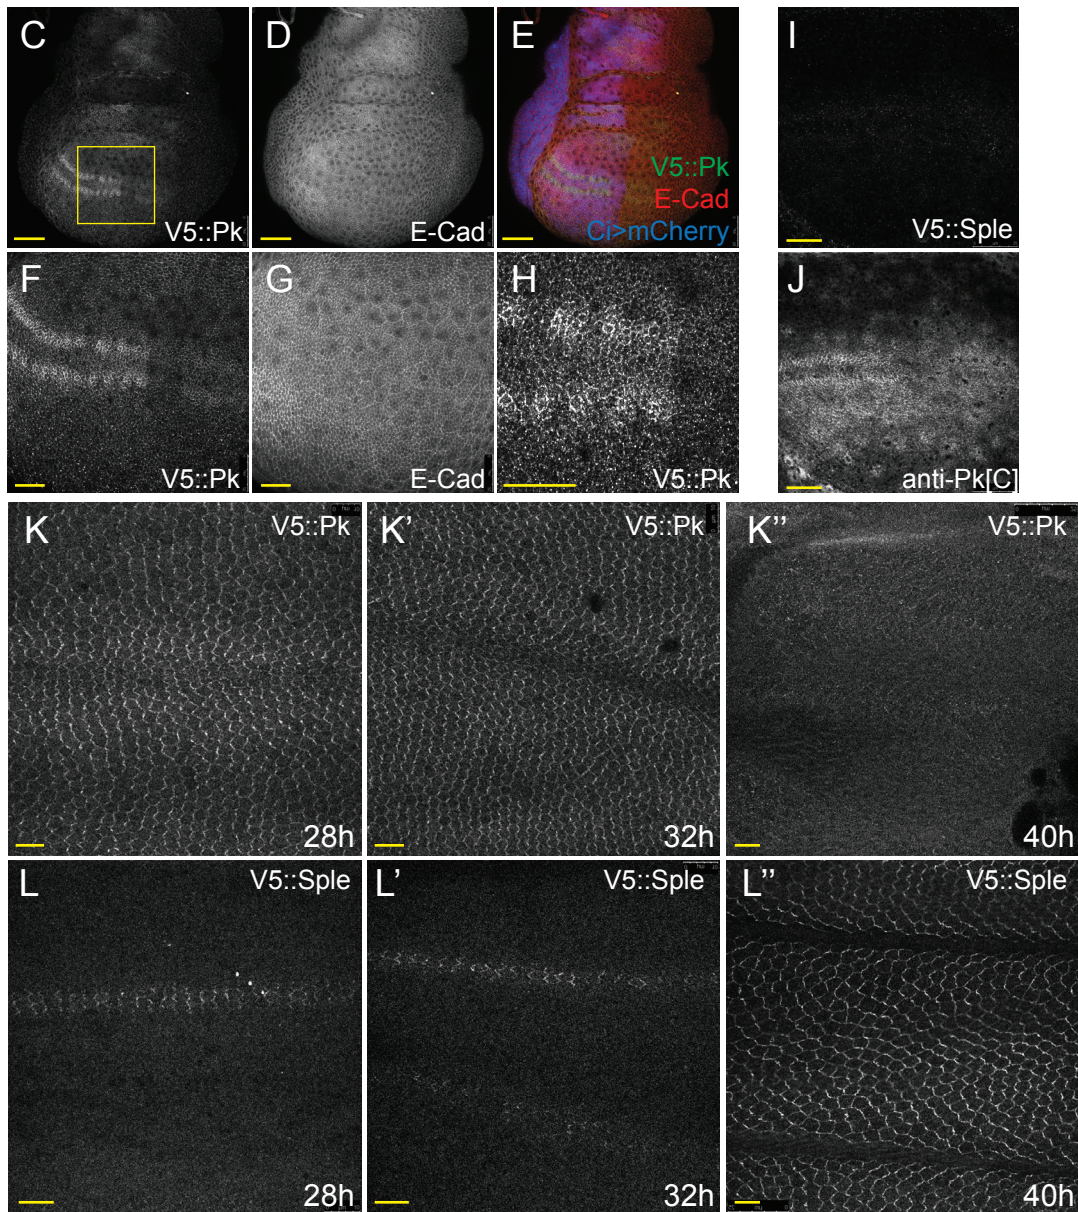

Supplement: supp [file elife-51456-supp-v1.zip]

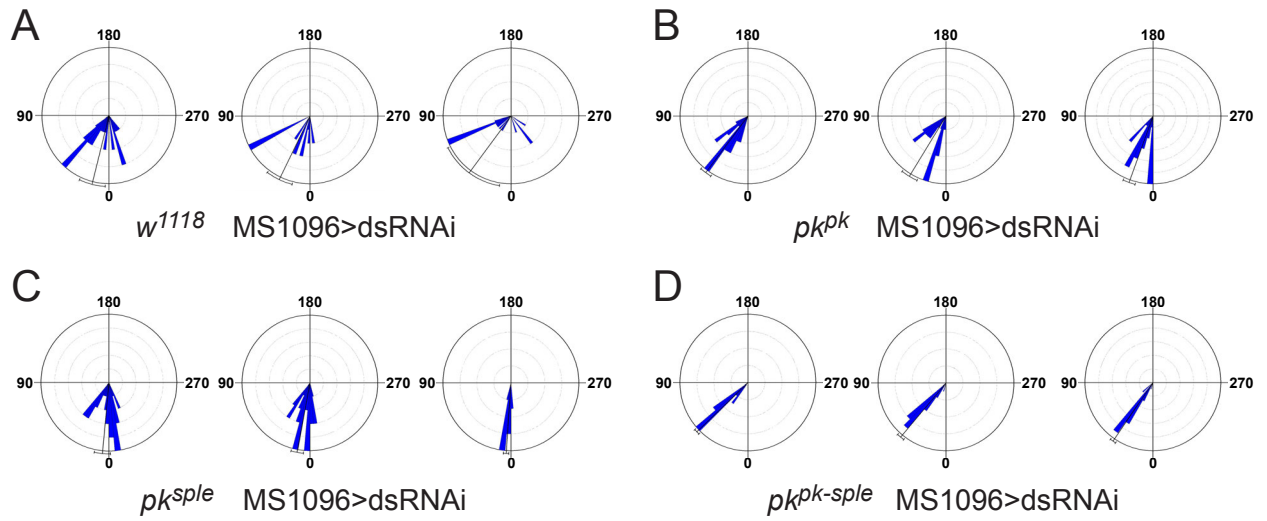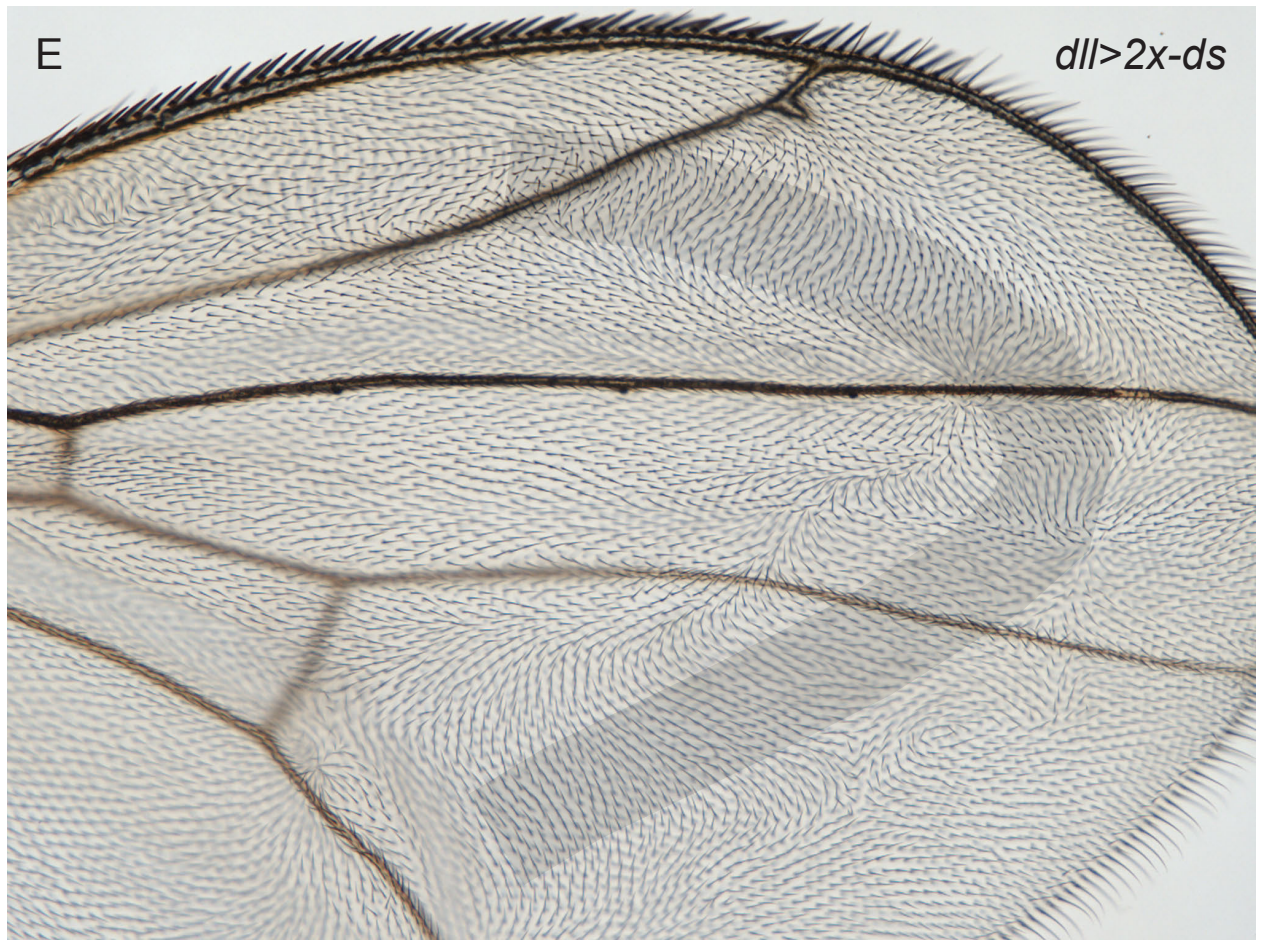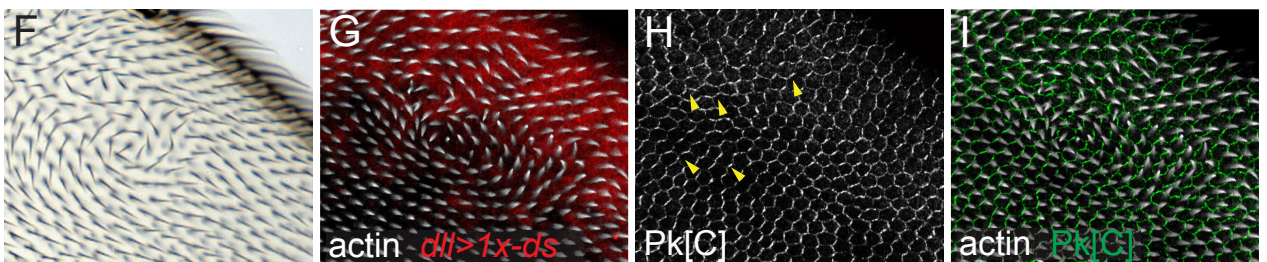

Supplement: supp [file elife-51456-supp-v1.zip]

*pkpk* mutants

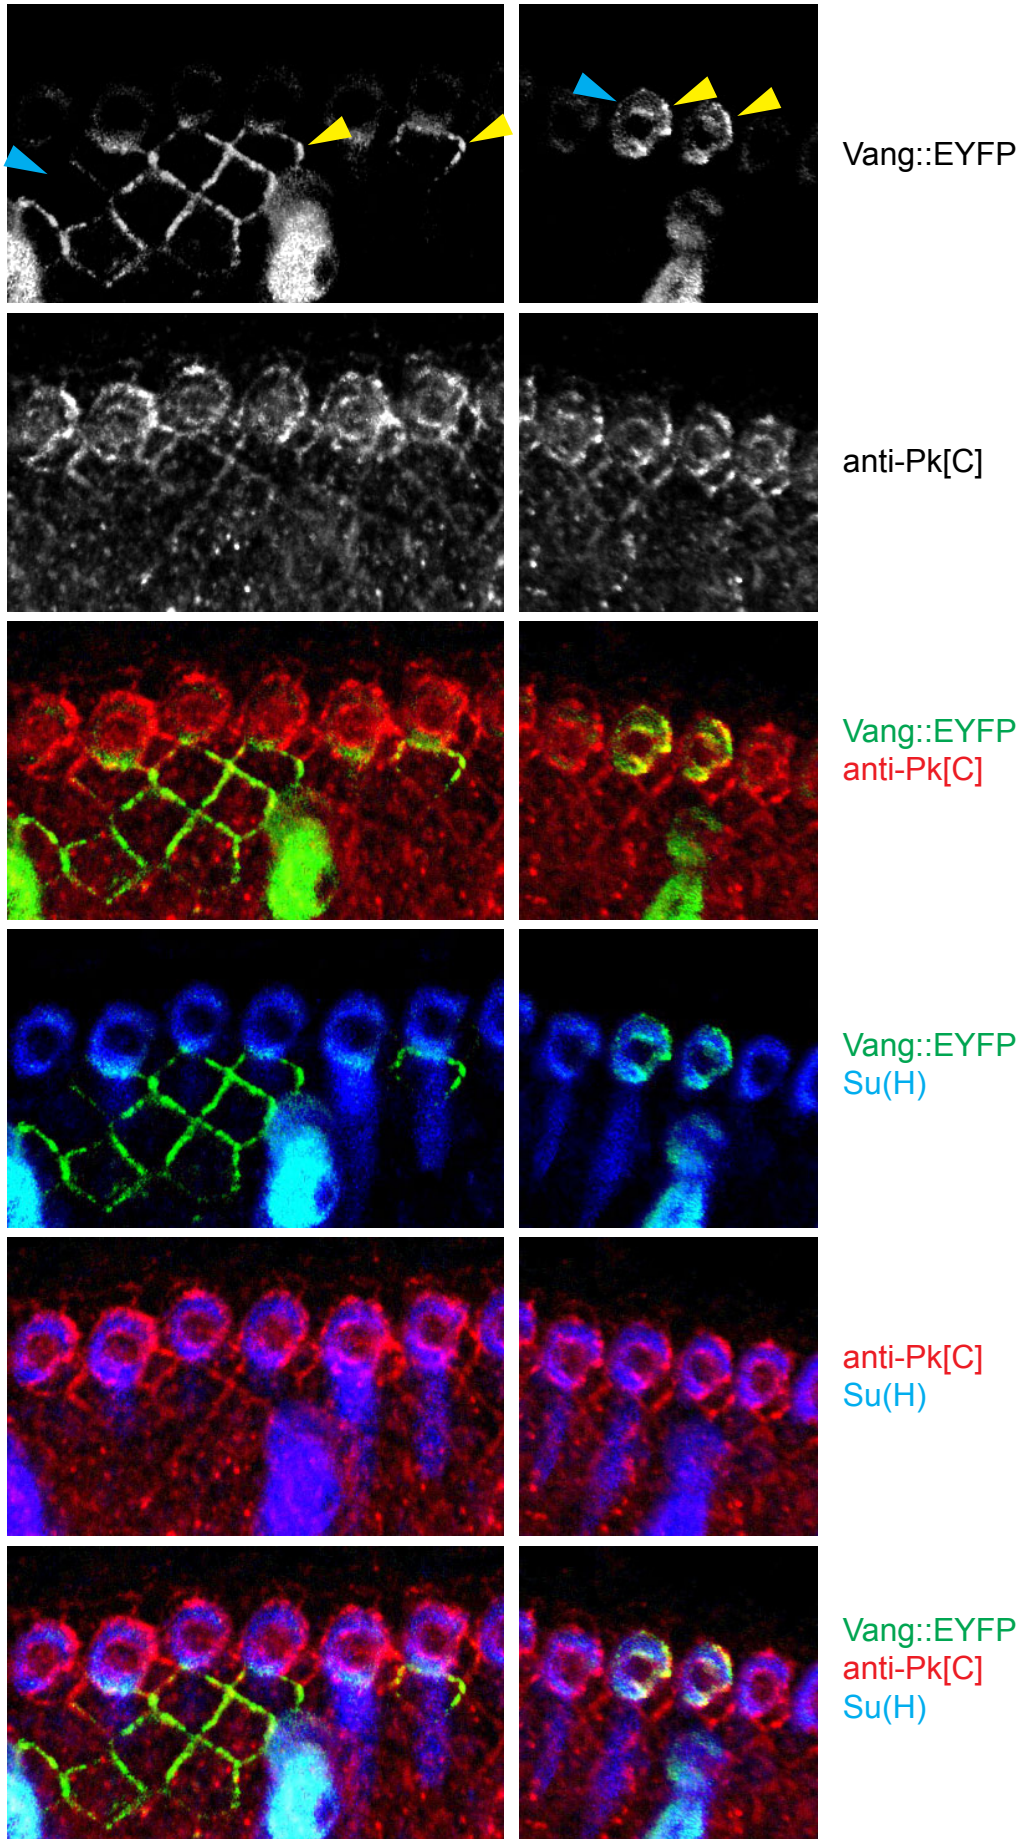

Supplement: supp [file elife-51456-supp-v1.zip]

A

*w<sup>1118</sup>*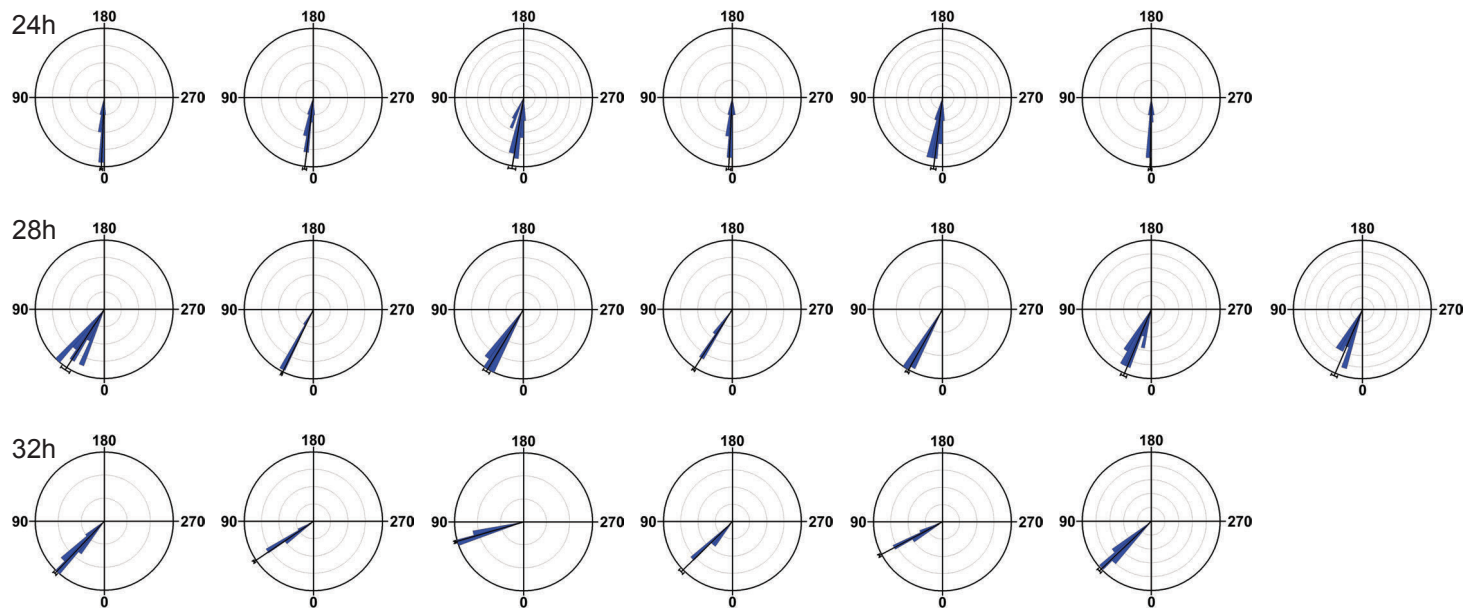*pkpk30*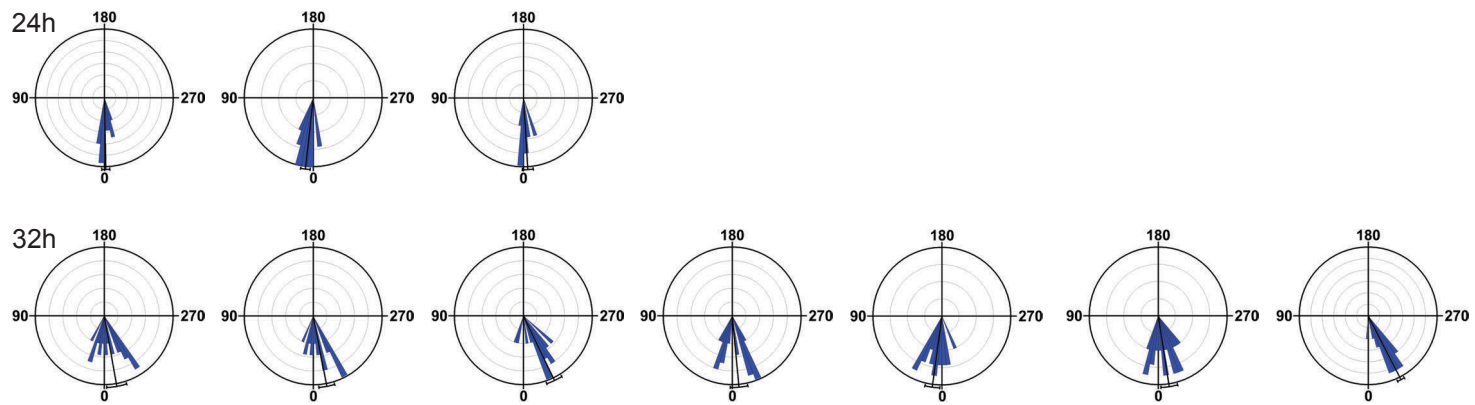

B

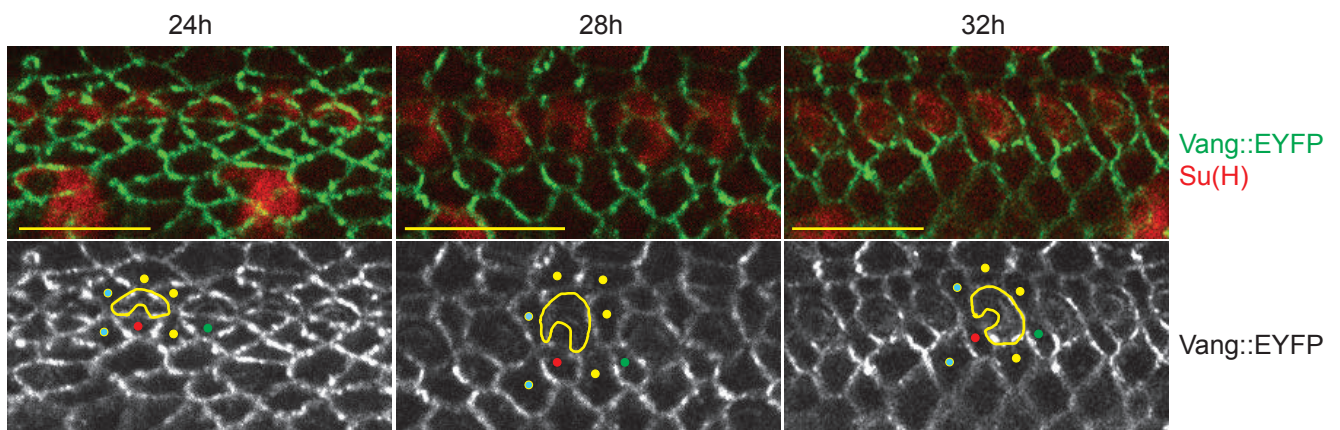

Supplement: supp [file elife-51456-supp-v1.zip]

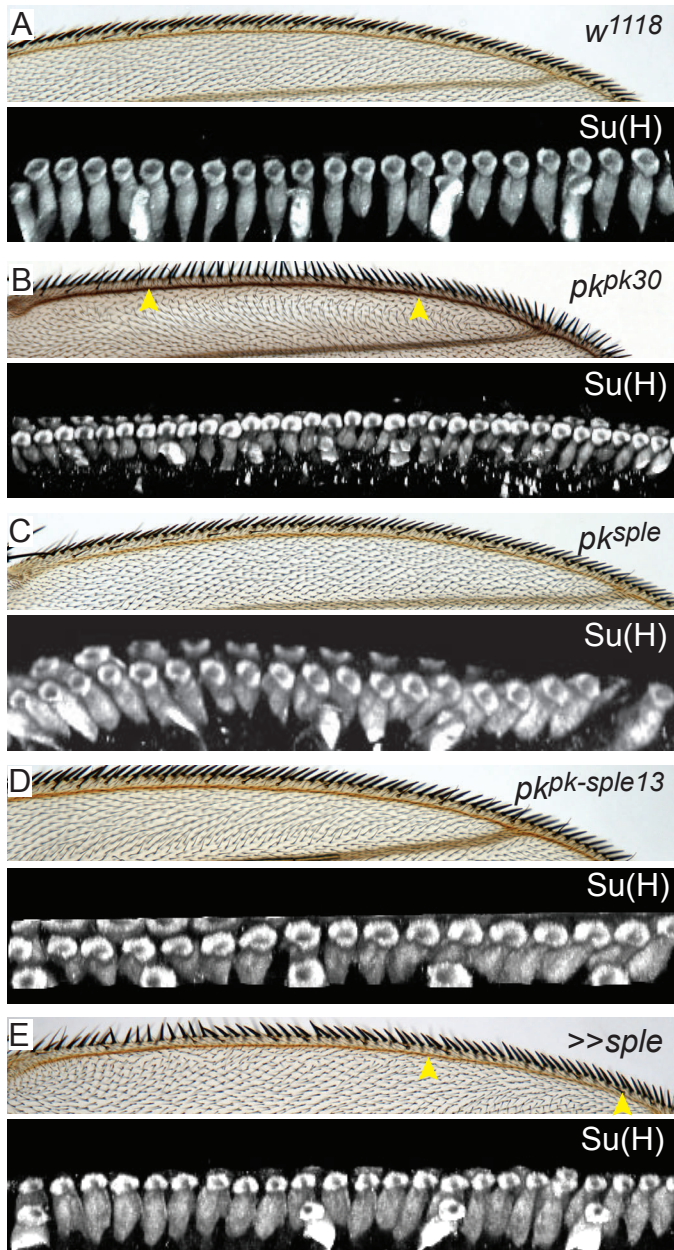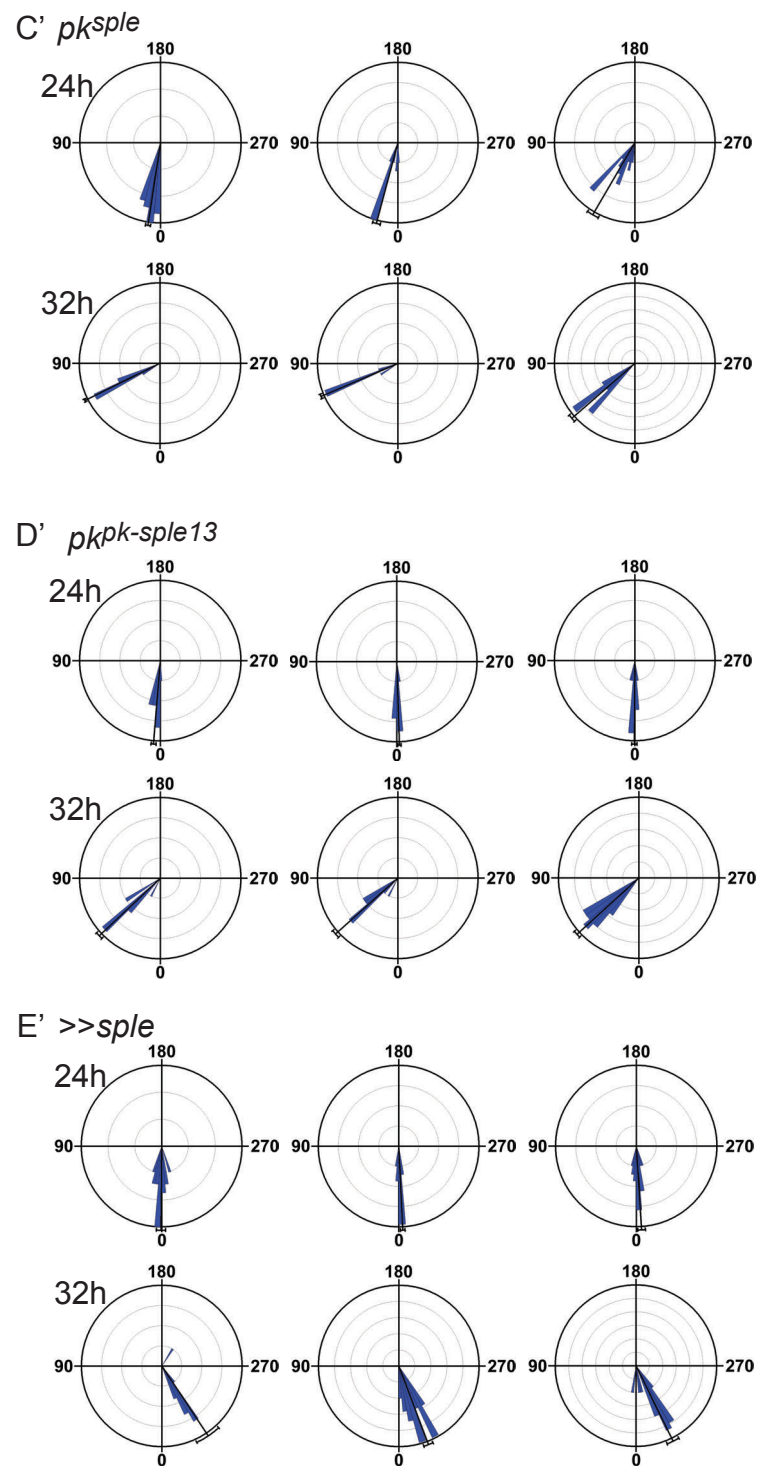

Supplement: supp [file elife-51456-supp-v1.zip]

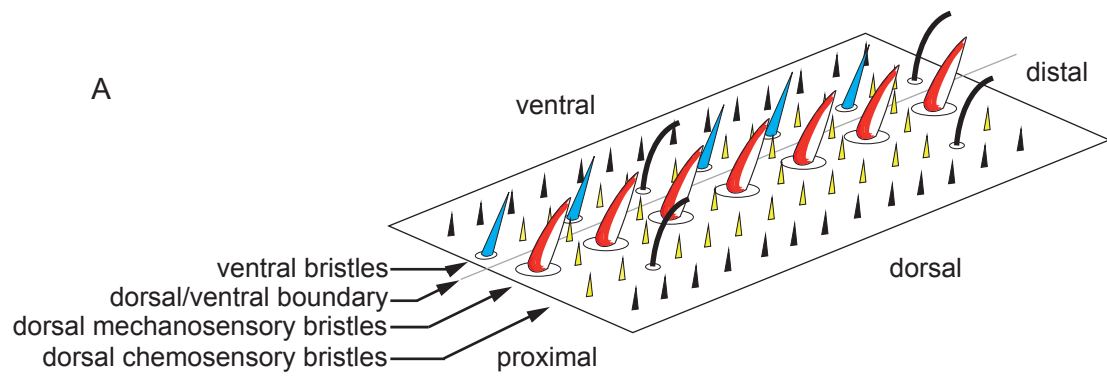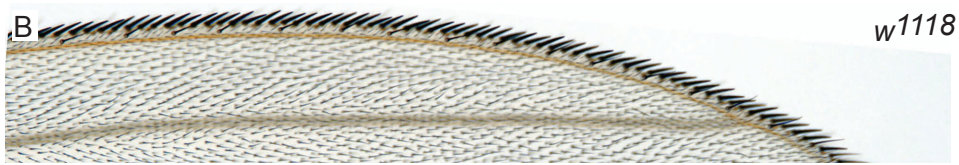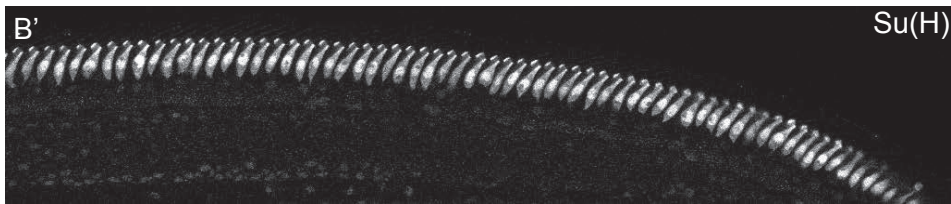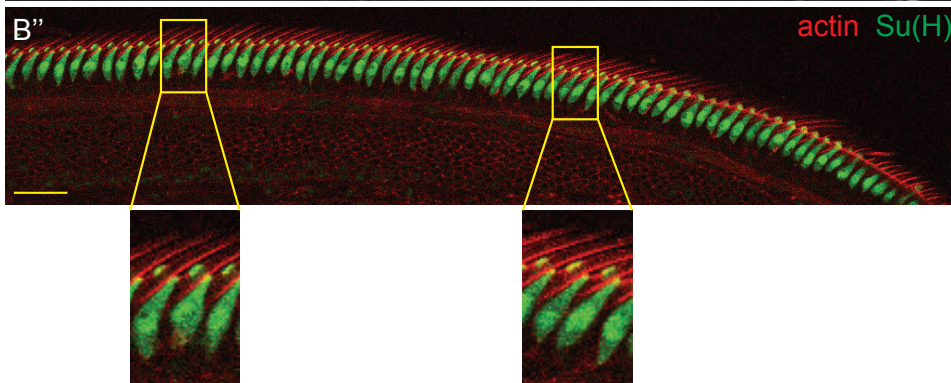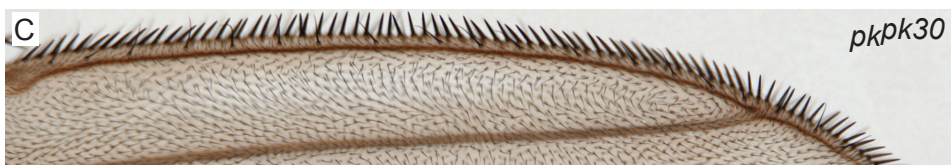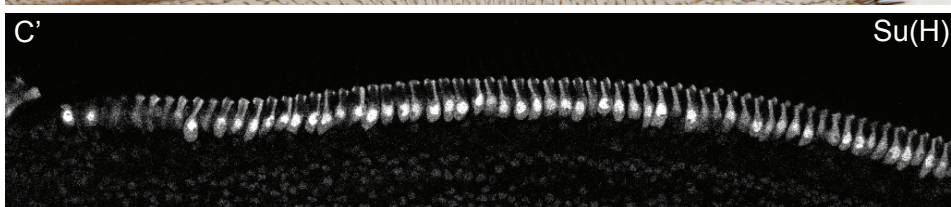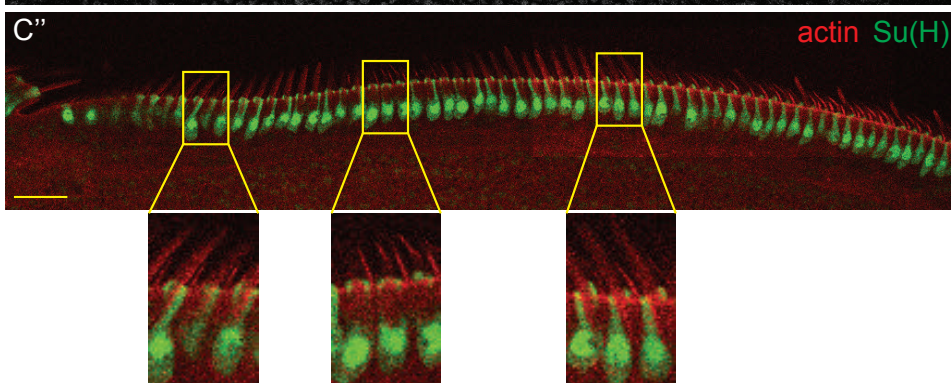

Supplement: supp [file elife-51456-supp-v1.zip]

Cho Figure 6 - figure supplement 1

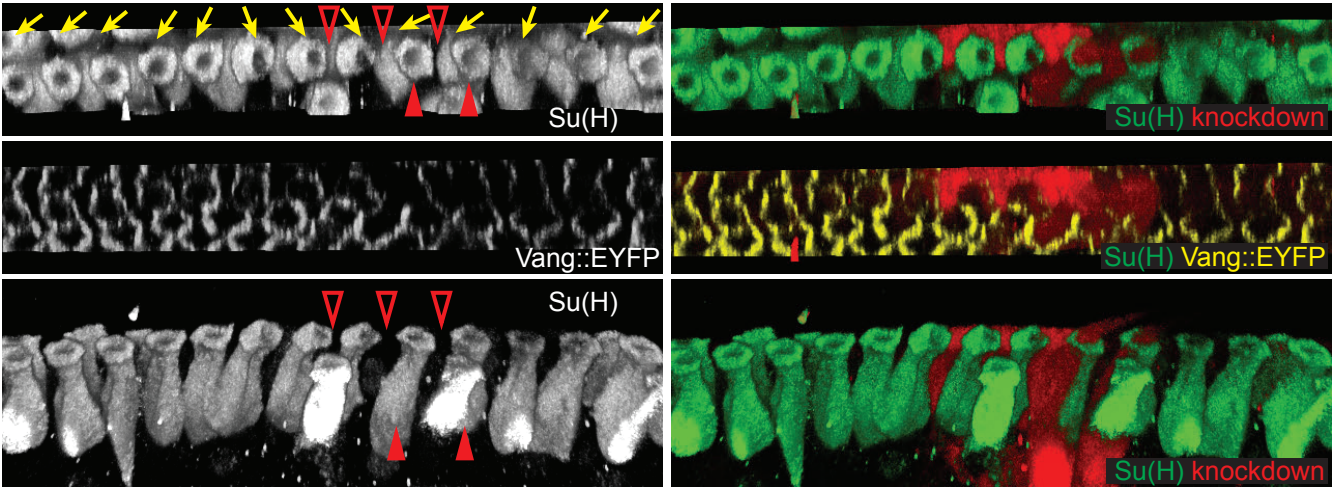

Supplement: supp [file elife-51456-supp-v1.zip]

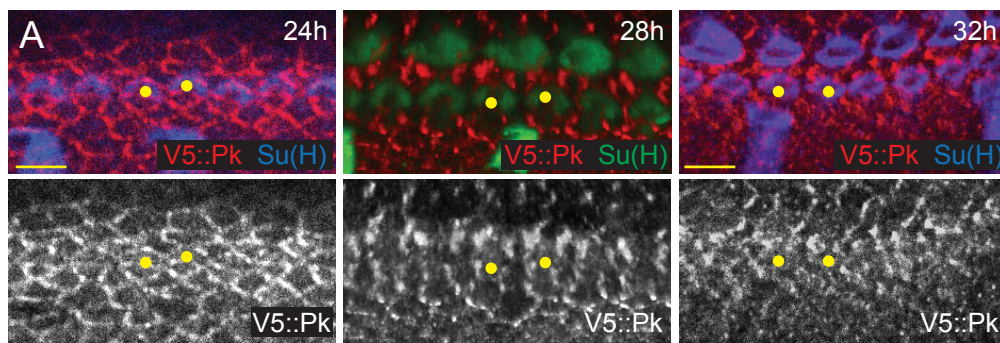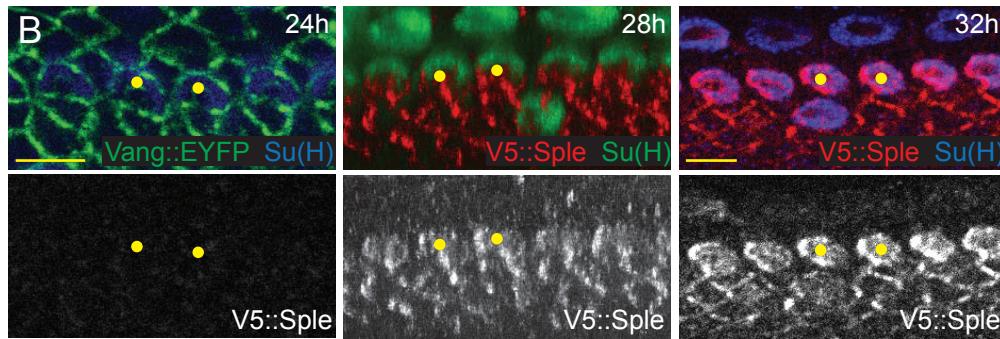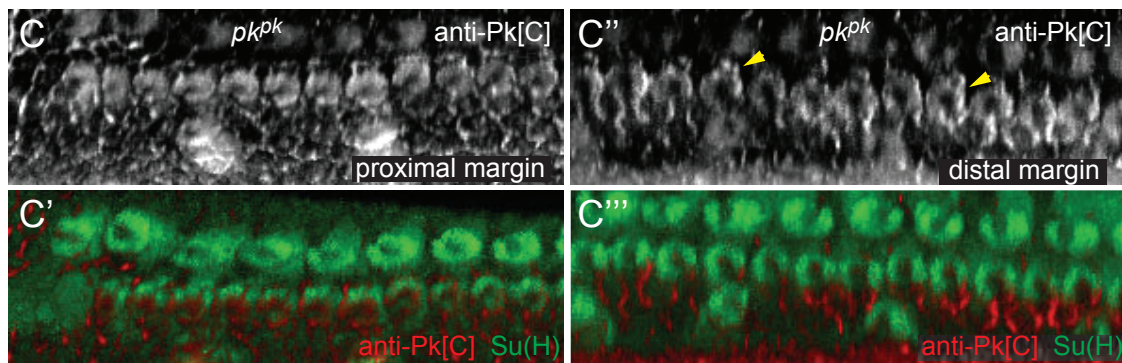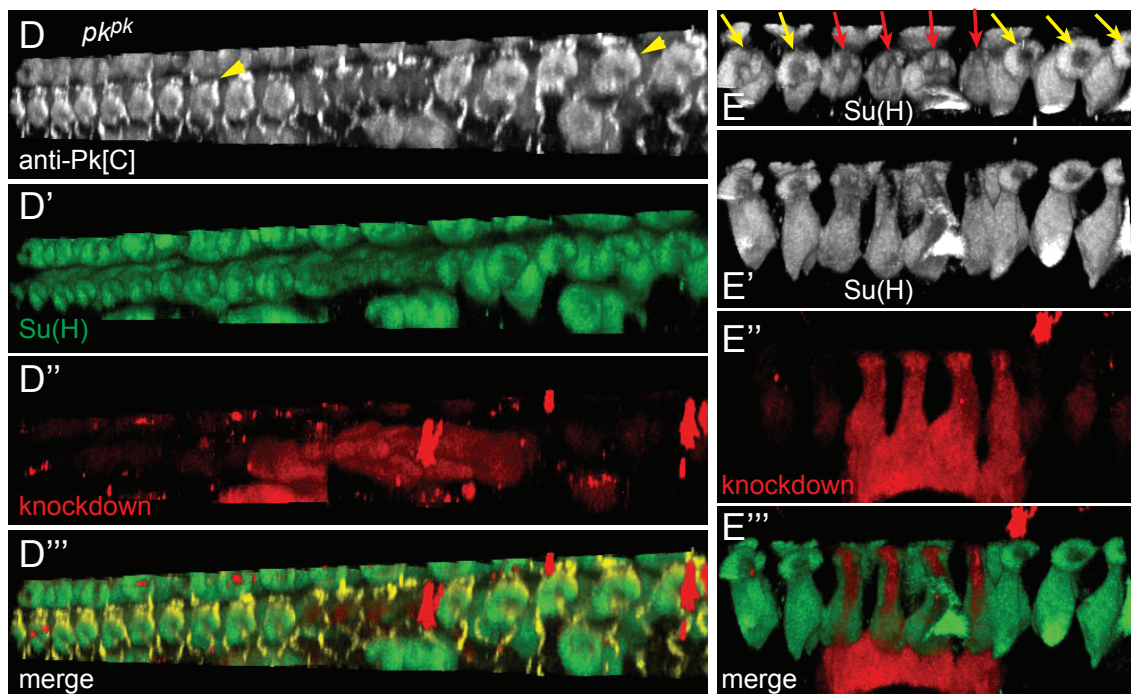

Supplement: supp [file elife-51456-supp-v1.zip]
